# Supplementary material for: Structure, dynamics and stability of water/scCO2/mineral interfaces from ab initio molecular dynamics simulations
Source: PubMed Central journal article supplement (PMC4600984; doi:10.1038/srep14857), 2015-10-12
Supplement: srep14857-s1.pdf [file srep14857-s1.pdf]

# Supporting Information

## Structure, dynamics and stability of water/scCO<sub>2</sub>/mineral interfaces from ab initio molecular dynamics simulations

*Mal-Soon Lee<sup>1</sup>, B. Peter McGrail<sup>2</sup>, Roger Rousseau<sup>1\*</sup>, Vassiliki-Alexandra Glezakou<sup>1\*</sup>*

<sup>1</sup>Fundamental and Computational Sciences Directorate, <sup>2</sup>Energy and Environment Directorate, Pacific Northwest National Laboratory, Richland, WA 99352

## S1. Simulation cell and structure of H<sub>2</sub>O and CO<sub>2</sub> monolayers.

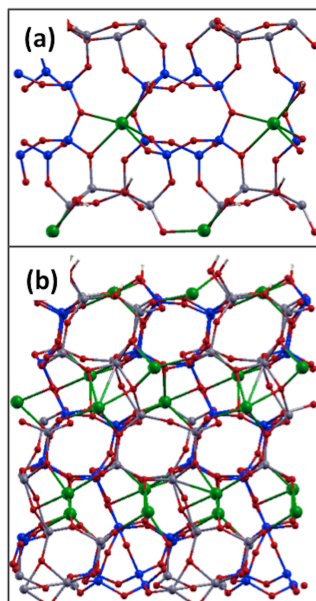

**Figure 1.** Structure of the Anorthite (001) slab used in this study: Atoms are represented by balls with color: Blue (Si), Grey (Al), Red (O), White (H) Green (Ca).

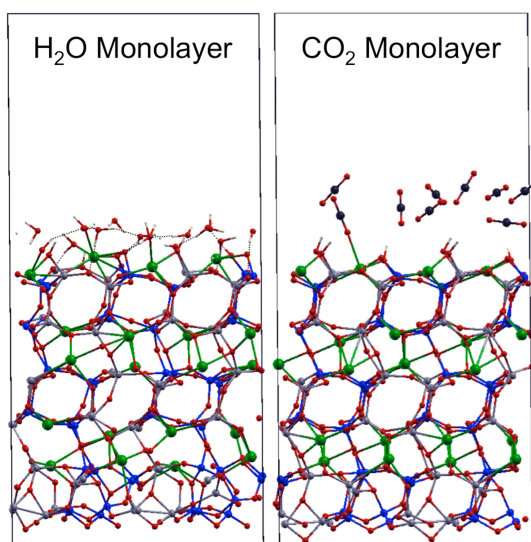

**Figure 2.** Structure of full coverage water and scCO<sub>2</sub> adlayer on the Ca-rich Anorthite (001) adlayer: H (white), C (black), O (red), Si (blue), Al (grey), and Ca (green).

**S2. Summary of simulation cell parameters and validation of liquid state of water and scCO<sub>2</sub> layers from AIMD simulations.**

**Table 1. Optimized cell parameters and simulation time.**

| System                                   | Cell parameters                                                                                                       | Interlayer spacing (Å) | Simulation time (ps) |
|------------------------------------------|-----------------------------------------------------------------------------------------------------------------------|------------------------|----------------------|
| <b>32CO<sub>2</sub></b>                  | $a=16.42 \text{ Å}, b=13.10 \text{ Å}, c=34.64 \text{ Å}$<br>$\alpha=90.1^\circ, \beta=90.5^\circ, \gamma=91.6^\circ$ | 18.3                   | 15                   |
| <b>14H<sub>2</sub>O</b>                  | $a=16.43 \text{ Å}, b=13.07 \text{ Å}, c=34.97 \text{ Å}$<br>$\alpha=90.0^\circ, \beta=90.5^\circ, \gamma=91.4^\circ$ | 18.3                   | 15                   |
| <b>1H<sub>2</sub>O/32CO<sub>2</sub></b>  | $a=16.42 \text{ Å}, b=13.10 \text{ Å}, c=34.64 \text{ Å}$<br>$\alpha=90.1^\circ, \beta=90.5^\circ, \gamma=91.6^\circ$ | 18.3                   | 225*                 |
| <b>2H<sub>2</sub>O/31CO<sub>2</sub></b>  | $a=16.42 \text{ Å}, b=13.10 \text{ Å}, c=34.64 \text{ Å}$<br>$\alpha=90.1^\circ, \beta=90.5^\circ, \gamma=91.6^\circ$ | 18.3                   | 224*                 |
| <b>3H<sub>2</sub>O/30CO<sub>2</sub></b>  | $a=16.42 \text{ Å}, b=13.10 \text{ Å}, c=34.64 \text{ Å}$<br>$\alpha=90.1^\circ, \beta=90.5^\circ, \gamma=91.6^\circ$ | 18.3                   | 241*                 |
| <b>10H<sub>2</sub>O/28CO<sub>2</sub></b> | $a=16.41 \text{ Å}, b=13.07 \text{ Å}, c=33.25 \text{ Å}$<br>$\alpha=89.9^\circ, \beta=90.6^\circ, \gamma=91.5^\circ$ | 17.0                   | 294*                 |
| <b>14H<sub>2</sub>O/28CO<sub>2</sub></b> | $a=16.43 \text{ Å}, b=13.07 \text{ Å}, c=34.97 \text{ Å}$<br>$\alpha=90.0^\circ, \beta=90.5^\circ, \gamma=91.4^\circ$ | 18.3                   | 428* <sup>†</sup>    |
| <b>15H<sub>2</sub>O/28CO<sub>2</sub></b> | $a=16.43 \text{ Å}, b=13.07 \text{ Å}, c=34.97 \text{ Å}$<br>$\alpha=90.0^\circ, \beta=90.5^\circ, \gamma=91.4^\circ$ | 18.3                   | 246*                 |
| <b>28H<sub>2</sub>O/21CO<sub>2</sub></b> | $a=16.43 \text{ Å}, b=13.07 \text{ Å}, c=35.09 \text{ Å}$<br>$\alpha=90.1^\circ, \beta=90.6^\circ, \gamma=91.3^\circ$ | 18.5                   | 234*                 |
| <b>42H<sub>2</sub>O/20CO<sub>2</sub></b> | $a=16.42 \text{ Å}, b=13.07 \text{ Å}, c=36.12 \text{ Å}$<br>$\alpha=90.1^\circ, \beta=90.5^\circ, \gamma=91.2^\circ$ | 19.2                   | 28                   |
| <b>84H<sub>2</sub>O</b>                  | $a=16.39 \text{ Å}, b=13.07 \text{ Å}, c=36.07 \text{ Å}$<br>$\alpha=90.2^\circ, \beta=90.5^\circ, \gamma=91.1^\circ$ | 19.3                   | 20                   |

\* Total time for both constraint and unconstraint MD simulations.

<sup>†</sup> Simulations for Ca positions and CO<sub>3</sub> formation are also included.

**Table 2.** Summary of simulation cell parameters and validation of liquid state of water and scCO<sub>2</sub> layers from AIMD simulations.

| Trajectory           | Diffusion Coefficient <sup>a</sup><br>(10 <sup>-4</sup> cm <sup>2</sup> /s)                                                                                                                                 | Density <sup>b</sup><br>(g/cm <sup>3</sup> )                                              |
|----------------------|-------------------------------------------------------------------------------------------------------------------------------------------------------------------------------------------------------------|-------------------------------------------------------------------------------------------|
| scCO <sub>2</sub>    | 1 <sup>st</sup> layer: D <sub>xy</sub> =0.3, D <sub>z</sub> =0.2<br>Liquid: D <sub>xy</sub> =1.4, D <sub>z</sub> =0.4                                                                                       | 1 <sup>st</sup> layer: 1.2<br>Liquid: 0.40                                                |
| Water                | 1 <sup>st</sup> layer: D <sub>xy</sub> =0.02, D <sub>z</sub> =0.01<br>Liquid: D <sub>xy</sub> =1.0, D <sub>z</sub> =0.2                                                                                     | 1 <sup>st</sup> layer: 1.9<br>Liquid: 1.02                                                |
| 1W                   | 1 <sup>st</sup> layer: D <sub>xy</sub> =0.03, D <sub>z</sub> =0.01                                                                                                                                          | 1 <sup>st</sup> layer: 2.1                                                                |
| 1W/scCO <sub>2</sub> | 1 <sup>st</sup> layer: D <sub>xy</sub> =0.01, D <sub>z</sub> =0.01<br>CO <sub>2</sub> Layer: D <sub>xy</sub> =1.1, D <sub>z</sub> =0.9<br>CO <sub>2</sub> Liquid: D <sub>xy</sub> =1.0, D <sub>z</sub> =0.3 | 1 <sup>st</sup> layer: 1.9<br>CO <sub>2</sub> Layer: 0.84<br>CO <sub>2</sub> Liquid: 0.49 |
| 2W/scCO <sub>2</sub> | 1 <sup>st</sup> layer: D <sub>xy</sub> =0.02, D <sub>z</sub> =0.01<br>CO <sub>2</sub> Liquid: D <sub>xy</sub> =1.0, D <sub>z</sub> =0.3                                                                     | 1 <sup>st</sup> layer: 1.8<br>CO <sub>2</sub> Liquid: 0.29                                |
| 3W/scCO <sub>2</sub> | 1 <sup>st</sup> layer: D <sub>xy</sub> =0.02, D <sub>z</sub> =0.01<br>CO <sub>2</sub> Liquid: D <sub>xy</sub> =1.0, D <sub>z</sub> =0.3                                                                     | 1 <sup>st</sup> layer: 1.9<br>CO <sub>2</sub> Liquid: 0.39                                |

<sup>a</sup>Diffusion Coefficient of scCO<sub>2</sub> 5.2x10<sup>-4</sup>cm<sup>2</sup>/s (P=101bar,T=323K)<sup>1</sup>, H<sub>2</sub>O 0.35x10<sup>-4</sup>cm<sup>2</sup>/s (P=101 bar, T=3218)<sup>2</sup>. <sup>b</sup>Density of scCO<sub>2</sub>, 0.4g/cm<sup>3</sup>, H<sub>2</sub>O 1.02g/cm<sup>3</sup> (T=323K, P=100bar).

The computed values of the diffusion coefficient (D) and Density for water and CO<sub>2</sub> are given in **Supplementary Table 2**. The D values were extracted from the slope of the mean square displacement correlation function and decomposed into components that are parallel, D<sub>xy</sub>, and perpendicular, D<sub>z</sub>, to the surface, see **Supplementary Figure 3** for the 1W/scCO<sub>2</sub> case. In both cases the density and diffusion are satisfactorily comparable to values measured experimentally.

<sup>1</sup> P. Etesse, J. A. Zega, and R. Kobayashi, *J. Chem. Phys.* 97, 2022 (1992).

<sup>2</sup> Harris, Kenneth R., and Lawrence A. Woolf. *J. Chem. Soc., Faraday Transactions 1*: 76 (1980): 377-385.

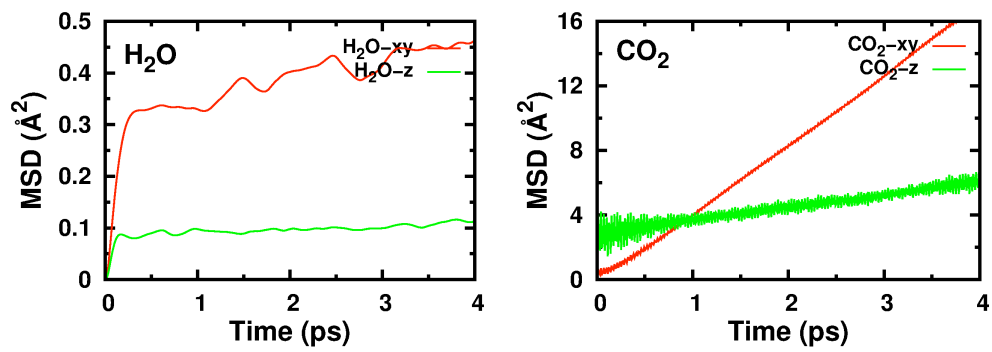

**Figure 3.** MSD for AIMD trajectory of H<sub>2</sub>O (left) and scCO<sub>2</sub> (right) for 1W/scCO<sub>2</sub> layer.

### S3. Atomic density profiles following Ca dissolution.

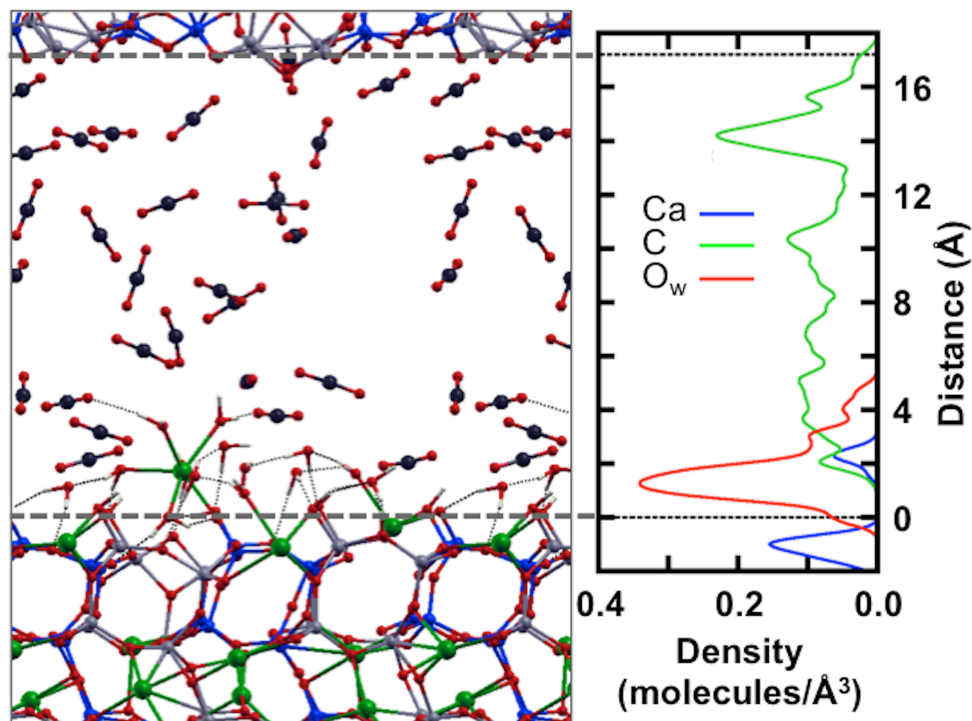

**Figure 4.** (a) Snapshot of liquid phases from AIMD runs at 323 K with  $\text{Ca}^{2+}$  ion solvated in 1W layer, Hydrogen (white), Carbon (dark grey), Oxygen (red), Silicon (blue), Aluminum (silver), Calcium (green). (b) Molecular density projected along the direction of the surface normal, Red (water), Green ( $\text{CO}_2$ ), Blue (Ca).

#### S4. Convergence of PMF.

To calculate potential mean force (PMF), we employed constrained MD based on the Blue-Moon sampling method: at each point in the PMF (11-18 points) a short ( $\sim 10$  ps) simulation was performed. In **Supplementary Figure 5**, we plot the expectation value of our constrained force,  $\langle F \rangle$ , as a function of our reaction distance,  $z$  coordinate of  $O_w$ , for selected PMFs. Error bars on  $\langle F \rangle$  are estimated to be at most  $\pm 0.0004$  a.u. As a rough estimate, an average bin with width of  $0.4 \text{ \AA}$  gives an approximate error for each point in our integration of *ca*  $\pm 2$  kJ/mol. A more detailed error analysis in the numerical integration of the force functions suggest an overall convergence of  $\pm 2$  kJ/mol for the  $\Delta A$  values reported in the text.

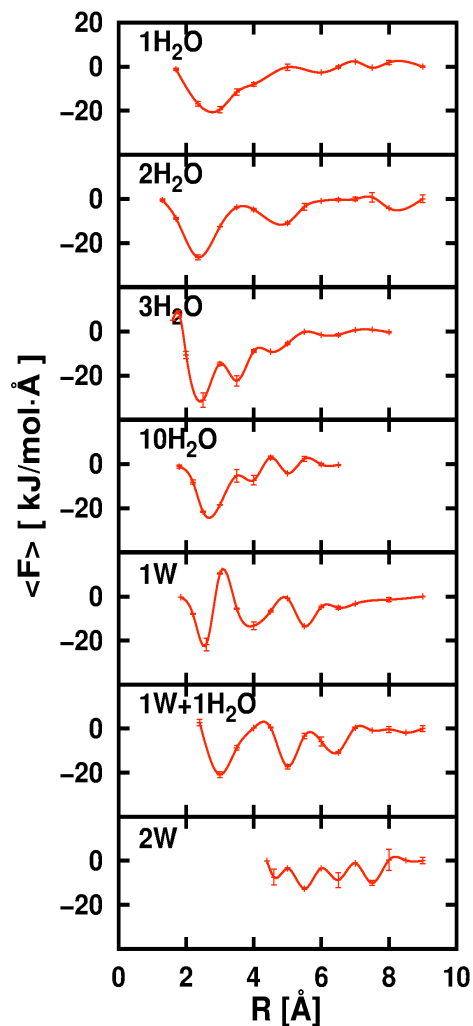

**Figure 5.** Expectation value of constrained force  $\langle F \rangle$  in kJ/mol· $\text{\AA}$ . as a function of reaction distance. Error bars are estimated via a plateau analysis<sup>1</sup>.

## S5. Density profiles from selected PMFs

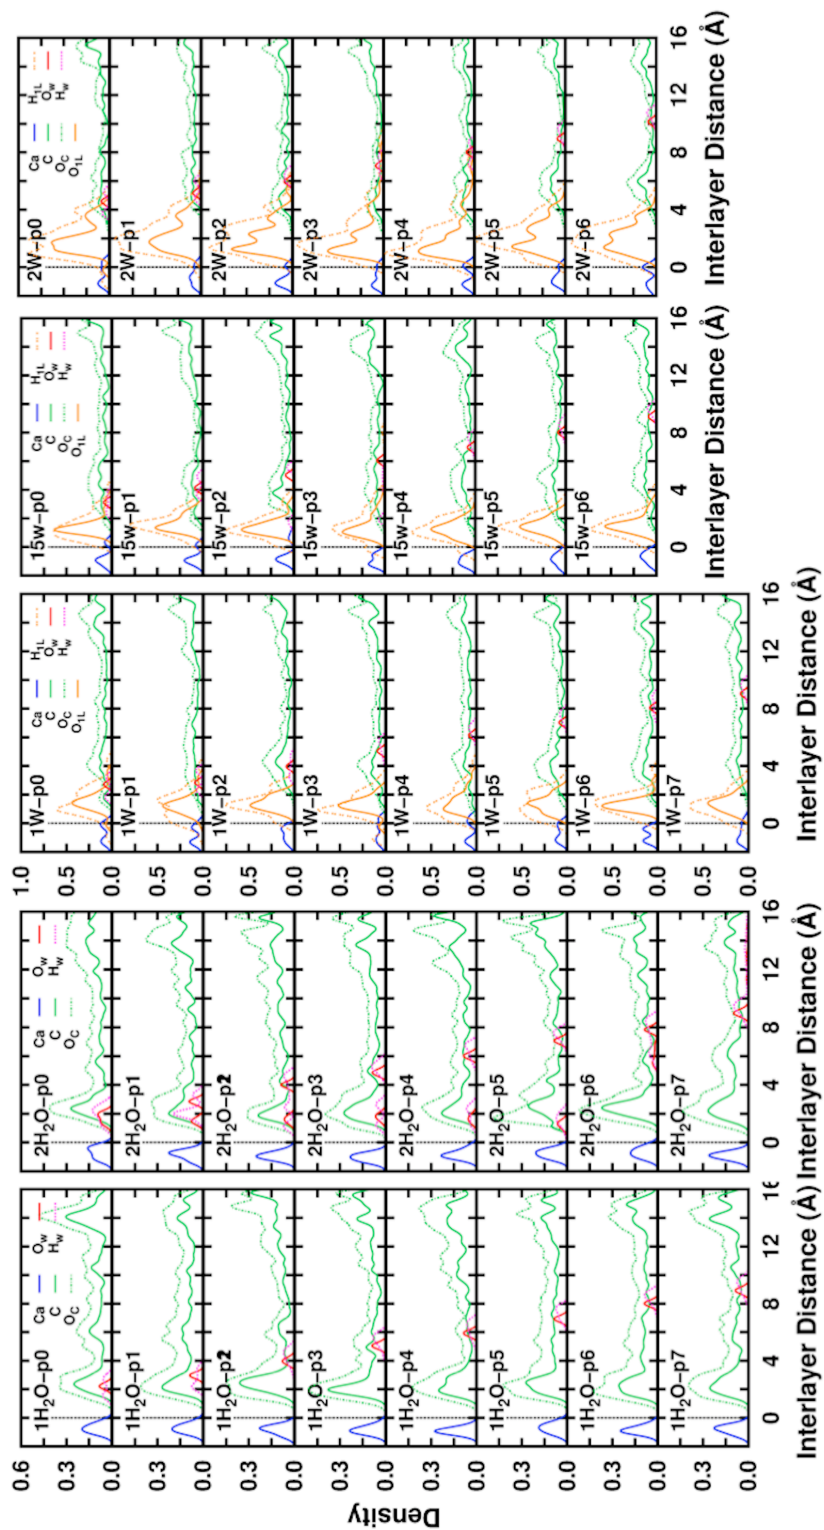

**Figure 6.** Molecular Density profiles for points along selected PMFs showing how molecular layers are perturbed by the constrained H<sub>2</sub>O molecules during the MD. Color Scheme same as Figure 7 in main text.



## S6. Converting dimer and trimer $\Delta A$ to correct reference state.

As discussed in the text the dimer ( $n=2$ ) and trimer ( $n=3$ ) simulations are performed with regards to a reference which is different from that of the  $n=1,7,18$  and 14 simulations. We can however adjust the resulting  $\Delta A$  values by the following arguments:

For the dimer we performed the simulation:

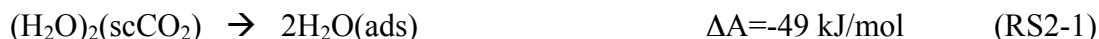

To make this consistent with  $n=7-14$  we need to compute:

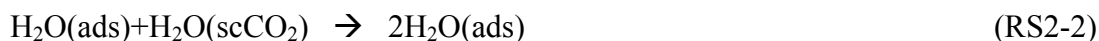

The dimer can be converted to a reference state of two monomers by the following chemical reactions:

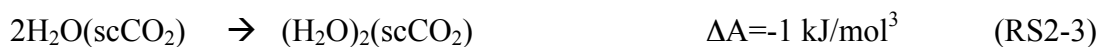

The adsorption of 1 monomer relative to a dimer can be expressed as:

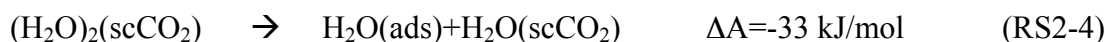

The free energy of (RS2-5) can be obtained by the following relationship (RS2-3)+(RS2-4) = (RS2-5):

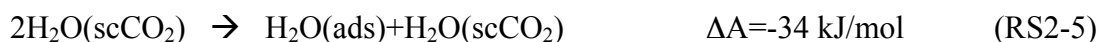

which is the reaction for the monomer obtained in the text.

Now subtracting reaction RS2-4 from RS2-1 provides reaction RS2-2. Hence:

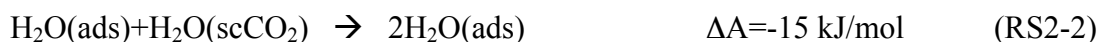

Similarly for the trimer. We have computed:

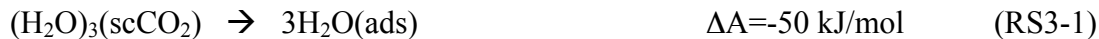

We require:

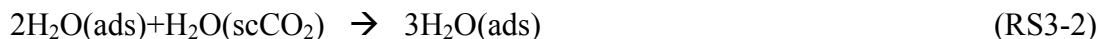

To achieve this, we note that:

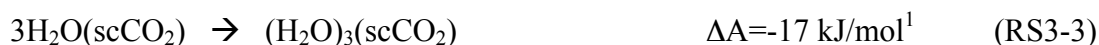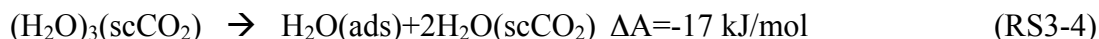

The energies of (RS3-4) comes from the use of the monomer reaction (-34 kJ/mol) and reaction (RS3-3). We can rewrite reaction (RS2-2) as reaction (RS3-5):

---

<sup>3</sup> Glezakou, V. A.; Rousseau, R.; Dang, L. X.; McGrail, B. P. *Physical Chemistry Chemical Physics* **2010**, *12*, 8759.

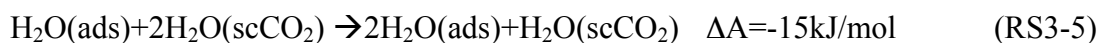

Summing (RS3-3) and (RS3)-5 provides:

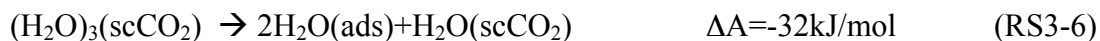

Finally subtracting (RS3-6) from (RS3-1) provides:

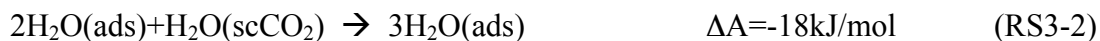

### S7. Entropy change using quasiharmonic approximation

To verify the entropy changes estimated from the Blue-Moon ensemble calculations reported in the text, we calculated entropies using a quasi-harmonic approximation where translational, rotational, and vibrational entropies are calculated from the principal root-mean-square fluctuations for the center of mass of H<sub>2</sub>O molecule, the principal moments of inertia of a H<sub>2</sub>O molecule, and vibrational density of states (VDOS), respectively. Detailed description of this approach can be found in the reference 4<sup>4</sup>. For the translational and rotational entropies, we used unconstrained MD simulation conducted with a configuration with one H<sub>2</sub>O molecule in the middle of the interlayer, while the vibrational entropy is calculated using constrained MD simulations conducted at two end positions (with H<sub>2</sub>O in the middle of the scCO<sub>2</sub> phase and the other with H<sub>2</sub>O at the surface). We have chosen two systems with 10 H<sub>2</sub>O and 14 H<sub>2</sub>O representing significant changes in entropy. The Table below shows the values of TAS obtained using the two independent methods.

| System             | Blue-Moon method (kJ/mol) | Quasi-harmonic analysis (kJ/mol) |
|--------------------|---------------------------|----------------------------------|
| 10H <sub>2</sub> O | -49±3                     | -60±9                            |
| 14H <sub>2</sub> O | -43±2                     | -52±8                            |

The entropic contribution from translation and rotation is ~40 kJ/mol for both systems. We should point out that convergence of the VDOS calculation is much slower than that for the force calculation. Error analysis of entropy from VDOS shows a larger error (~15 %) than that with Blue-Moon method (~5 %). Thus results from two methods agree fairly well, giving confidence to our discussion about free energetics.

---

<sup>4</sup> Carlsson, J. and Åqvist, J. *The Journal of Physical Chemistry B* **2005**, 109, 6448-6456.

## S8. Cartesian coordinates and cell parameters of structures employed in binding energy analysis.

### A. Anorthite slab + 14 H<sub>2</sub>O

CRYSTAL

PRIMVEC

|               |               |               |
|---------------|---------------|---------------|
| 16.4340235543 | 0.0000000000  | 0.0000000000  |
| -0.3203164176 | 13.0680953535 | 0.0000000000  |
| -0.2856096309 | 0.0038537095  | 34.9691087411 |

PRIMCOORD

|     |               |               |               |
|-----|---------------|---------------|---------------|
| 358 | 1             |               |               |
| Si  | 6.8850926111  | 10.6133596982 | 1.6770133577  |
| Si  | 15.0910314798 | 10.6113212861 | 1.6732846128  |
| Si  | 4.2289296540  | 9.8067613651  | 1.9096187243  |
| Si  | 12.4545188432 | 9.8092317653  | 1.8758843031  |
| Si  | 6.6438712353  | 5.5665535246  | 2.2467199291  |
| Si  | 14.8769109363 | 5.5623647355  | 2.2732292394  |
| Si  | 12.2467109593 | 6.8691059977  | 2.3174123334  |
| Si  | 3.9994344309  | 6.8729009176  | 2.3138754535  |
| Si  | 0.0880322662  | 9.8837008947  | 4.2288309439  |
| Si  | 8.3354421876  | 9.8973983655  | 4.2096410661  |
| Si  | 8.1630810463  | 6.7678238120  | 4.4034399060  |
| Si  | -0.0551632076 | 6.7605124877  | 4.4543055033  |
| Si  | 5.3588496266  | 10.7080718558 | 4.8643211528  |
| Si  | 13.5609925195 | 10.7060111497 | 4.8576054332  |
| Si  | 5.1049458112  | 5.8408238223  | 4.8777615969  |
| Si  | 13.3313104521 | 5.8460610733  | 4.9093824197  |
| Si  | 12.2290299909 | 10.1387781643 | 7.6567021885  |
| Si  | 4.0318725598  | 10.1383950142 | 7.6629106518  |
| Si  | 4.1459620368  | 5.5178351267  | 7.7709169928  |
| Si  | 12.3466293699 | 5.5395869387  | 7.7865379003  |
| Si  | 9.3747830075  | 9.3032920829  | 8.4269931772  |
| Si  | 1.1913087224  | 9.3104627023  | 8.4488018587  |
| Si  | 1.1659485691  | 6.2473811760  | 8.6171763139  |
| Si  | 9.3509607811  | 6.2414767206  | 8.6130782002  |
| Si  | 13.5593191630 | 9.3638265724  | 10.3452933629 |
| Si  | 5.3548298709  | 9.3605287670  | 10.3497938552 |
| Si  | 5.2524093489  | 6.3152876758  | 10.5861345140 |
| Si  | 13.4745524107 | 6.3221694607  | 10.6153515252 |
| Si  | 10.5789896146 | 10.1198520845 | 11.2153012343 |
| Si  | 2.3897592362  | 10.1227709397 | 11.2525666581 |
| Si  | 2.4680026404  | 5.4445644890  | 11.2666685582 |
| Si  | 10.6700237820 | 5.4553388425  | 11.2579519627 |
| Si  | 9.2812823226  | 9.6023380938  | 14.0057584228 |
| Si  | 1.0605663343  | 9.6127726192  | 14.0249527926 |
| Si  | 1.1483256849  | 4.9628288362  | 14.0906964002 |
| Si  | 9.4001669658  | 4.9444155450  | 14.0853339098 |
| Si  | 6.4599332422  | 8.7559434567  | 14.5510025590 |
| Si  | 14.6663783325 | 8.7805282182  | 14.5941146299 |
| Si  | 6.3927694156  | 5.7116280770  | 14.8453654218 |
| Si  | 14.6103988873 | 5.7497172271  | 14.8168896091 |
| Si  | 10.4444617787 | 8.8099273186  | 16.7023309894 |
| Si  | 2.2324137480  | 8.8430109864  | 16.7605966955 |

|    |               |               |               |
|----|---------------|---------------|---------------|
| Si | 2.2137668712  | 5.8462331458  | 16.9088610185 |
| Si | 10.5214453233 | 5.8174156061  | 16.8632991772 |
| Si | 7.4042030039  | 9.4070690379  | 17.4819717333 |
| Si | 15.6355389167 | 9.4023741758  | 17.5521794199 |
| Si | 15.8013714062 | 5.0173378980  | 17.5945382325 |
| Si | 7.6300118682  | 4.9883511689  | 17.5976201616 |
| Al | 8.4648782759  | 3.2771297128  | 1.5829864263  |
| Al | 0.2756383911  | 3.2818928293  | 1.5650381895  |
| Al | 2.9322290340  | 12.4985940180 | 1.6087722071  |
| Al | 11.1175181803 | 12.4925221123 | 1.6016238861  |
| Al | 10.8605789873 | 4.1160992806  | 1.7493815210  |
| Al | 2.6675430574  | 4.1107418207  | 1.7491103973  |
| Al | 8.3542966216  | 0.3005735115  | 2.2045466298  |
| Al | 0.1568864359  | 0.3100363416  | 2.1897964874  |
| Al | 13.0750310181 | 3.3693304829  | 3.6784418168  |
| Al | 4.8526370203  | 3.3538260950  | 3.6862296907  |
| Al | 12.7276558008 | 0.4737027280  | 4.0600851567  |
| Al | 4.5070500491  | 0.4600857325  | 4.0770765312  |
| Al | 10.1276573254 | 4.3166248589  | 4.7041297302  |
| Al | 1.9262155567  | 4.3136739930  | 4.7013141320  |
| Al | 9.4298560208  | 12.5427766579 | 4.8954170484  |
| Al | 1.1772568173  | 12.5392867922 | 4.8755781433  |
| Al | 8.5832425537  | 3.5237873500  | 7.4913470666  |
| Al | 0.3715694003  | 3.5378979112  | 7.4840234208  |
| Al | -0.0838584020 | 12.0089551888 | 7.8316073872  |
| Al | 8.1111681065  | 12.0059445333 | 7.8221240342  |
| Al | 5.5619699556  | 2.7703903122  | 8.1967849108  |
| Al | 13.7969311820 | 2.8052813591  | 8.2259018350  |
| Al | 5.0453756229  | 12.8370728134 | 8.4266493987  |
| Al | 13.2735657088 | 12.8471361798 | 8.4752157872  |
| Al | 1.6206618153  | 2.8234728884  | 10.3291446512 |
| Al | 9.8186536990  | 2.8236586407  | 10.3331703296 |
| Al | 1.1001084045  | 12.8532076769 | 10.8270245922 |
| Al | 9.3010686544  | 12.8512089263 | 10.8252978204 |
| Al | 6.7995012501  | 3.5490681822  | 11.1564995338 |
| Al | 15.0453158942 | 3.5648176891  | 11.2002040568 |
| Al | 14.5273427524 | 12.1268450741 | 11.3411844308 |
| Al | 6.3158729696  | 12.1273291469 | 11.2933927649 |
| Al | 5.3279321330  | 2.9799841509  | 13.9915143876 |
| Al | 13.5854722949 | 2.9656099445  | 14.0430415264 |
| Al | 4.9337381368  | 11.4818982833 | 14.1188821672 |
| Al | 13.1680336415 | 11.5218554208 | 14.2133737689 |
| Al | 2.3885635671  | 2.1638223361  | 14.6583654739 |
| Al | 10.6301726818 | 2.1715570121  | 14.6298647495 |
| Al | 1.8761584276  | 12.1983217978 | 14.9493821681 |
| Al | 10.0716128005 | 12.2077345533 | 15.1355445578 |
| Al | 6.6120783685  | 2.2201946989  | 16.8677090749 |
| Al | 14.9628569710 | 2.2148686951  | 16.9045126398 |
| Al | 6.2069137471  | 12.2537816542 | 17.0220636188 |
| Al | 14.4728207193 | 12.2680225152 | 17.1078840738 |
| Al | 3.4845819578  | 3.1500394864  | 17.6713471430 |
| Al | 11.8295368530 | 3.1696111570  | 17.6590031598 |
| Al | 3.1465199863  | 11.6252579578 | 17.7826885495 |

|    |               |               |               |
|----|---------------|---------------|---------------|
| AI | 11.3877334180 | 11.5601691307 | 17.8416583472 |
| O  | 9.7787665930  | 3.6185146754  | 0.5212278210  |
| O  | 1.5945819130  | 3.6220872238  | 0.5136024199  |
| O  | 13.9183121349 | 9.7276402551  | 1.0381451971  |
| O  | 5.7006780559  | 9.7151153855  | 1.0951443751  |
| O  | 11.4232767241 | 10.8185454975 | 1.2347575155  |
| O  | 3.2329929011  | 10.8263207743 | 1.2350990007  |
| O  | 7.1320191750  | 4.4314528719  | 1.3126440955  |
| O  | 15.3768497806 | 4.4414487772  | 1.3266610548  |
| O  | 1.6663814111  | -0.1335651597 | 1.4706891439  |
| O  | 9.8524548565  | -0.1352729082 | 1.4606168679  |
| O  | 6.9278103749  | 12.1203648978 | 1.3839106515  |
| O  | 15.1764341772 | 12.1159907899 | 1.3819714241  |
| O  | 15.9226316216 | 1.8273972838  | 1.9049434812  |
| O  | 7.6786310929  | 1.8286959233  | 1.9774137968  |
| O  | 5.4650917686  | 6.5368021393  | 1.6763347986  |
| O  | 13.7096244823 | 6.5326382302  | 1.6784555082  |
| O  | 3.5098109583  | 8.3636772347  | 1.9002652271  |
| O  | 11.7579142063 | 8.3582147325  | 1.8973088900  |
| O  | 11.0803253898 | 5.8690412767  | 2.0368322559  |
| O  | 2.8355108339  | 5.8695560930  | 2.0351008588  |
| O  | 12.3258034715 | 3.3341878867  | 2.1830802274  |
| O  | 4.1368096205  | 3.3334500333  | 2.1763935396  |
| O  | 12.7570308948 | 0.0671195286  | 2.4041874035  |
| O  | 4.5727800330  | 0.0718532171  | 2.4134128159  |
| O  | -0.3365292231 | 9.8012298053  | 2.6305932526  |
| O  | 7.9178612796  | 9.8112503099  | 2.6114639344  |
| O  | 7.8469191093  | 6.5386145119  | 2.8430144921  |
| O  | -0.3895765146 | 6.5495278966  | 2.8992765750  |
| O  | 9.6076194750  | 3.7956596980  | 3.1261663455  |
| O  | 1.4171690650  | 3.7832811865  | 3.1242991667  |
| O  | 13.0181062999 | 10.0961719756 | 3.4384546137  |
| O  | 4.7521833071  | 10.0884436010 | 3.4827292942  |
| O  | 14.2340410433 | 4.8672102489  | 3.7644675125  |
| O  | 5.9914978135  | 4.8682680215  | 3.7287741160  |
| O  | 8.3516565385  | -0.1449427334 | 3.9318567006  |
| O  | 0.1091306504  | -0.0852598778 | 3.9283480583  |
| O  | 12.5722887248 | 7.0498883688  | 4.0049210822  |
| O  | 4.3220436142  | 7.0483500912  | 4.0020133861  |
| O  | 1.3725249261  | 10.7459232501 | 4.5967815340  |
| O  | 9.6261515257  | 10.7452316200 | 4.6024972713  |
| O  | 8.7378366516  | 8.3406307153  | 4.6757985343  |
| O  | 0.4899852881  | 8.3409352132  | 4.7384354677  |
| O  | 13.5737886825 | 1.9539007063  | 4.5237398791  |
| O  | 5.3197069597  | 1.9537141615  | 4.5779945900  |
| O  | 11.1921454748 | 0.4324535152  | 4.8730000090  |
| O  | 2.9639454897  | 0.3756850696  | 4.8680122364  |
| O  | 5.2069354467  | 12.2734587463 | 4.9569477048  |
| O  | 13.3933180958 | 12.2706172660 | 4.9598671483  |
| O  | 3.8686979476  | 4.5687857854  | 4.8037697479  |
| O  | 12.0973473828 | 4.5728204061  | 4.8106402179  |
| O  | 6.9042266314  | 10.0978747156 | 5.0386027146  |
| O  | 15.1085608560 | 10.1053306168 | 5.0879877629  |

|   |               |               |               |
|---|---------------|---------------|---------------|
| O | 1.2755306308  | 6.0187310481  | 5.0272153817  |
| O | 9.4700306380  | 6.0174657250  | 5.0227685051  |
| O | 6.7359739574  | 6.6831170502  | 5.2538526478  |
| O | 14.9641358180 | 6.6704061232  | 5.3227498725  |
| O | 9.5911433908  | 3.3433264654  | 6.0344119648  |
| O | 1.3983963081  | 3.3445024462  | 6.0382391895  |
| O | 12.8485335512 | 9.7907402939  | 6.1247053342  |
| O | 4.6669212263  | 9.7899571625  | 6.1391943443  |
| O | 12.8571220551 | 6.4477838760  | 6.4643176208  |
| O | 4.6714267777  | 6.4043494329  | 6.4441741699  |
| O | 8.8909099304  | 12.9210117556 | 6.5326544931  |
| O | 0.6402900075  | 12.9221002996 | 6.5097343555  |
| O | 6.4355432934  | 12.3372250853 | 7.5067562979  |
| O | 14.6712538955 | 12.3434766621 | 7.5714669915  |
| O | 7.0283960553  | 2.7788833977  | 7.2116131820  |
| O | 10.8211891543 | 9.2293716104  | 7.5738215813  |
| O | 2.6306431244  | 9.2246651660  | 7.5793901226  |
| O | 15.2318119280 | 2.8333549187  | 7.2039695247  |
| O | 0.0611839483  | 10.1420979800 | 7.6635057532  |
| O | 8.2430957953  | 10.1368414027 | 7.6516678181  |
| O | 12.5494672971 | 3.9902042486  | 7.6456731958  |
| O | 4.3089939289  | 3.9644728419  | 7.6422437705  |
| O | 2.6276294337  | 6.1727078617  | 7.8696029079  |
| O | 10.8146833021 | 6.1687561140  | 7.8715938764  |
| O | 4.7280067926  | 1.2629895879  | 7.7943555753  |
| O | 12.9708638858 | 1.2894748941  | 7.8519931447  |
| O | 0.0987096631  | 5.2207878705  | 8.0840002538  |
| O | 8.2841501694  | 5.2101715624  | 8.0834083360  |
| O | 11.9853933718 | 11.6190159908 | 8.0868699723  |
| O | 3.7435990928  | 11.6136047865 | 8.0857310528  |
| O | 0.5479256907  | 7.7646917205  | 8.2339752253  |
| O | 8.7304542989  | 7.7578801344  | 8.2279174835  |
| O | 1.4003345936  | 2.6805405054  | 8.6033877907  |
| O | 9.6436935690  | 2.6871151343  | 8.6019089200  |
| O | 13.2956692693 | 9.2907825302  | 8.6647785003  |
| O | 5.0988150651  | 9.2918826840  | 8.6689572460  |
| O | 5.0320735756  | 6.1799454292  | 8.9910326138  |
| O | 13.2169124439 | 6.1788648876  | 9.0281323633  |
| O | 0.7896962859  | 12.2730971520 | 9.2452263480  |
| O | 8.9651608460  | 12.2725961133 | 9.2487796394  |
| O | 9.6911717145  | 9.4407922045  | 10.0013068625 |
| O | 1.5079563789  | 9.4371326440  | 10.0314281420 |
| O | 5.7659123095  | 2.9726183951  | 9.9018333151  |
| O | 14.0189367907 | 2.9844292564  | 9.9314942503  |
| O | 5.3034603077  | 12.9223698280 | 10.1247376266 |
| O | 13.4897466967 | 12.9165889924 | 10.1838418717 |
| O | 1.4294127341  | 6.3320692099  | 10.2695931608 |
| O | 9.6160916231  | 6.3307034294  | 10.2666698263 |
| O | 11.1415862409 | 4.0632293368  | 10.7100634048 |
| O | 2.9530779990  | 4.0609493420  | 10.7072699554 |
| O | 5.9408017013  | 7.8431790836  | 10.7782813940 |
| O | 14.1715439155 | 7.8522658320  | 10.7765481771 |
| O | 14.6377480063 | 10.3936505996 | 10.8415932535 |

|   |               |               |               |
|---|---------------|---------------|---------------|
| O | 6.4525246097  | 10.3967266723 | 10.7868211153 |
| O | 0.3251568260  | 3.7112011526  | 11.0793003485 |
| O | 8.5117743554  | 3.7036308487  | 11.0712775492 |
| O | 2.2750857739  | 1.3167921799  | 10.9252168779 |
| O | 10.4693788862 | 1.3165892004  | 10.9330196793 |
| O | 12.0902732771 | 9.4358483644  | 11.0805617941 |
| O | 3.9067238311  | 9.4402371547  | 11.1359327900 |
| O | 6.3506734228  | 5.3928532726  | 11.2979315111 |
| O | 14.5874265074 | 5.4280632329  | 11.3462664210 |
| O | 10.5165005643 | 11.6617892961 | 11.4418565408 |
| O | 2.3273339606  | 11.6700010458 | 11.4428130694 |
| O | 3.8298917482  | 6.4506606473  | 11.4323392754 |
| O | 12.0307717467 | 6.4544385484  | 11.4365670387 |
| O | 16.0778876837 | 12.7830312223 | 11.7902665669 |
| O | 7.8472604620  | 12.7845994128 | 11.7979651137 |
| O | 10.0424587022 | 9.2292983846  | 12.5533647209 |
| O | 1.8471530784  | 9.2199459044  | 12.5876518674 |
| O | 6.2639817492  | 2.6173820602  | 12.5469676635 |
| O | 14.5204872073 | 2.6204162724  | 12.5938817748 |
| O | 1.7951354669  | 5.8043516070  | 12.7518877104 |
| O | 9.9771324175  | 5.8059929687  | 12.7358826524 |
| O | 5.3618644990  | 12.4800417612 | 12.7425220871 |
| O | 13.6102226248 | 12.4812032705 | 12.8100840252 |
| O | 3.7736595150  | 2.3272724668  | 13.6204414586 |
| O | 12.0296027017 | 2.3186205353  | 13.6224580111 |
| O | 16.1179284768 | 8.6532678879  | 13.7747613260 |
| O | 7.9147671659  | 8.6436279333  | 13.7594958354 |
| O | 5.3425029511  | 9.6500587614  | 13.8343122865 |
| O | 13.5242279257 | 9.6735062630  | 13.9059332176 |
| O | 1.1855952790  | 3.4033167571  | 14.1291212974 |
| O | 7.8580668811  | 5.5931364726  | 14.0575644001 |
| O | 16.0580544080 | 5.6471206659  | 13.9868964923 |
| O | 9.4328315385  | 3.3832040747  | 14.0605526847 |
| O | 3.2473241824  | 11.3337047618 | 14.3507504535 |
| O | 11.4868452434 | 11.4704109779 | 14.5014560471 |
| O | 5.8386955548  | 7.2067917589  | 14.2832343290 |
| O | 14.0242804488 | 7.2435858358  | 14.2855158536 |
| O | 5.2487065252  | 4.7136129013  | 14.4149288672 |
| O | 9.7219248009  | 0.6676442195  | 14.5821136478 |
| O | 1.5411837801  | 0.6563489864  | 14.4206953688 |
| O | 13.4950385475 | 4.7098375005  | 14.4163850825 |
| O | 0.5619320900  | 11.0256050439 | 14.4825006122 |
| O | 8.8184185391  | 10.9906725258 | 14.5685974896 |
| O | 10.2720101462 | 8.7155485037  | 15.0158775265 |
| O | 2.0720109043  | 8.7818233862  | 15.0777841101 |
| O | 6.1832632464  | 2.1148670203  | 15.2212842257 |
| O | 14.4375525068 | 2.0989961747  | 15.2817453259 |
| O | 2.0006313691  | 5.6724361983  | 15.2954570210 |
| O | 10.3224262812 | 5.6531462653  | 15.2385452797 |
| O | 6.0789145949  | 12.0429580131 | 15.3004814530 |
| O | 14.3394110759 | 12.0560886614 | 15.3801371127 |
| O | 14.8414193497 | 8.9307973131  | 16.1726108404 |
| O | 6.5930694906  | 8.9311908919  | 16.1305172129 |

|    |               |               |               |
|----|---------------|---------------|---------------|
| O  | 2.7259107979  | 2.3235280434  | 16.3875161306 |
| O  | 10.9817504713 | 2.4758816836  | 16.3357337305 |
| O  | 6.6583062363  | 5.8162548848  | 16.4551246179 |
| O  | 14.9189401529 | 5.8829371411  | 16.4060753674 |
| O  | 10.1414668885 | 12.3496476719 | 16.9026027563 |
| O  | 1.9731831410  | 12.2761468302 | 16.6824116163 |
| O  | 2.9064911767  | 7.3478173071  | 17.0555601633 |
| O  | 11.1637651160 | 7.3407906831  | 16.9860273600 |
| O  | 16.1405137334 | 3.5196634443  | 17.1214696400 |
| O  | 7.8760989138  | 3.4663095890  | 17.1304234136 |
| O  | 3.2697514551  | 9.8595810355  | 17.4185831771 |
| O  | 11.4590891417 | 9.8745428042  | 17.2677600066 |
| O  | 8.9479873126  | 8.8674480247  | 17.3382872713 |
| O  | 0.7588823520  | 8.9316475099  | 17.4005628163 |
| O  | 7.3606905499  | 0.7230783697  | 17.3390500843 |
| O  | 15.6756237605 | 0.7265072797  | 17.4832376567 |
| O  | 3.3917629035  | 4.9407583469  | 17.5580832807 |
| O  | 11.7063619966 | 4.9561257466  | 17.5585807962 |
| O  | 0.8092420641  | 5.8188352885  | 17.7081822163 |
| O  | 9.0980383775  | 5.7367094326  | 17.6230284112 |
| O  | 7.2613927135  | 10.9639824747 | 17.7761373951 |
| O  | 15.4272065168 | 10.9414475457 | 17.8558616624 |
| O  | 5.2459989501  | 2.8250093117  | 17.9076888669 |
| O  | 13.5919147503 | 2.9119341509  | 17.9272789464 |
| O  | 4.7358938242  | 12.2601261564 | 17.9275693455 |
| O  | 12.9269548854 | 12.3519874858 | 17.9252357638 |
| O  | 6.6570717155  | 8.4270546704  | 18.5926928752 |
| O  | 14.9860607076 | 8.3545498643  | 18.6587320919 |
| O  | 6.8152910619  | 5.2985673422  | 18.9415012050 |
| O  | 14.8338546244 | 5.1580982782  | 18.8677974646 |
| O  | 2.6933309534  | 2.5531561782  | 19.1449400003 |
| O  | 11.0367442519 | 2.4593153377  | 19.0858631829 |
| O  | 10.8745038057 | 11.5363358977 | 19.5926748653 |
| O  | 2.2464426824  | 12.1314210559 | 19.2485360524 |
| Ca | 2.7291354393  | 7.8349644369  | 5.5578975726  |
| Ca | 10.9461264475 | 7.8384048369  | 5.5411627287  |
| Ca | 15.3024377892 | 0.9467477939  | 5.7556488019  |
| Ca | 7.1036939007  | 0.9399479445  | 5.7307604210  |
| Ca | 10.8715820254 | 1.5200966363  | 7.0123027870  |
| Ca | 2.6278535605  | 1.5035866526  | 7.0000361449  |
| Ca | 14.9308865972 | 8.4071928025  | 6.9703864221  |
| Ca | 6.6957095816  | 8.3783349204  | 6.9474018187  |
| Ca | 4.4658827149  | 1.3055312899  | 11.5532042701 |
| Ca | 12.6881153381 | 1.3353706814  | 11.5652562313 |
| Ca | -0.2407920171 | 7.0138813012  | 11.9537680254 |
| Ca | 7.9472301208  | 6.9533474559  | 11.9637232835 |
| Ca | 3.7161484537  | 7.9633970097  | 13.4094462245 |
| Ca | 11.9332782965 | 7.9718986748  | 13.4057777030 |
| Ca | 7.5000237379  | 0.6512815775  | 13.8343183535 |
| Ca | 15.7446819071 | 0.6436336443  | 13.8456485207 |
| Ca | 1.4626209316  | 0.8228433088  | 17.9878312258 |
| Ca | 9.5113683464  | 1.1866495583  | 17.6942012751 |
| Ca | 5.0208663540  | 6.6177685788  | 18.3976005678 |



|    |               |               |               |
|----|---------------|---------------|---------------|
| Ca | 13.2383583091 | 6.7557979003  | 18.3806903899 |
| H  | 5.4830237331  | 2.8391111901  | 18.8949199560 |
| H  | 13.9852470840 | 3.6614545858  | 18.4844378342 |
| H  | 6.7242654201  | 8.6307434552  | 19.5661031602 |
| H  | 15.5929425610 | 7.9617095282  | 19.3936376769 |
| H  | 2.2823962435  | 3.2510003980  | 19.7068055579 |
| H  | 11.7041754725 | 1.9384643970  | 19.6096219798 |
| H  | 2.7684640698  | 12.2260409678 | 20.0642091428 |
| H  | 11.3796005703 | 12.2324587091 | 20.0771373872 |
| O  | 5.0960476287  | 11.9855684889 | 20.6122827314 |
| O  | 12.9518846977 | 7.0520090792  | 20.6917321335 |
| O  | 16.1647781738 | 6.9737738150  | 20.5319913357 |
| O  | 8.3718329568  | 12.2722186192 | 19.9613578071 |
| O  | 12.5648037718 | 13.7226058661 | 20.1051310963 |
| O  | 5.8284033561  | 2.8277863834  | 20.4737803666 |
| O  | 8.1537388113  | 6.1847946490  | 20.8489342265 |
| O  | 4.5328515182  | 5.5112585329  | 20.6222980308 |
| O  | 8.3404106129  | 1.8262129818  | 20.0367472297 |
| O  | 10.4540269305 | 7.4003072193  | 19.8974797387 |
| O  | 12.8944558661 | 9.7274863156  | 20.1912232875 |
| O  | 3.8745758064  | 8.3488437698  | 19.6712181818 |
| O  | 1.8310731355  | 4.8642661468  | 20.6212043664 |
| O  | 6.4916463327  | 8.2043633794  | 21.2690806105 |
| H  | 5.0538770527  | 12.1234511400 | 19.6173795019 |
| H  | 6.0502474253  | 12.0029679699 | 20.8076567077 |
| H  | 13.1377575493 | 8.0244533095  | 20.7892313445 |
| H  | 11.9580782477 | 7.0605778095  | 20.7257814805 |
| H  | 15.6478377344 | 6.1871893728  | 20.2102042146 |
| H  | 17.0840350165 | 6.6855474655  | 20.3521165449 |
| H  | 7.9383369572  | 11.8049003607 | 19.2002770721 |
| H  | 9.3287037026  | 11.9340247810 | 19.9239958933 |
| H  | 13.3559877145 | 13.8535456850 | 20.6523362319 |
| H  | 12.8745443776 | 13.2615890631 | 19.2374845637 |
| H  | 5.3419489413  | 2.0402731645  | 20.7909777830 |
| H  | 6.7863762230  | 2.5286511248  | 20.4187422313 |
| H  | 8.3724233805  | 5.4811074579  | 21.4836382669 |
| H  | 7.6185673690  | 5.7372269293  | 20.0499191976 |
| H  | 4.8974317449  | 6.0915309373  | 21.3197027050 |
| H  | 5.0835624864  | 4.6850848935  | 20.6466807448 |
| H  | 9.1958854018  | 2.2241838427  | 20.3005255979 |
| H  | 8.4279799189  | 0.8273146239  | 20.1744449814 |
| H  | 9.6011391798  | 6.9624361711  | 20.1634019282 |
| H  | 10.2625832641 | 8.3525514527  | 19.8328566551 |
| H  | 12.1170803612 | 10.3370818886 | 20.0901265328 |
| H  | 13.6129640835 | 10.1407921920 | 19.6781178101 |
| H  | 4.3770024833  | 8.8393456204  | 20.3496665570 |
| H  | 3.6258368657  | 9.0349600137  | 18.9945583838 |
| H  | 1.4690302999  | 4.7177662263  | 21.5128774483 |
| H  | 2.7676538438  | 5.1460437825  | 20.7635124065 |
| H  | 7.1793224308  | 7.4660418228  | 21.2930779915 |
| H  | 6.7538231809  | 8.8555116388  | 21.9429289929 |

## B. Anorthite slab + 9 CO<sub>2</sub>

CRYSTAL

PRIMVEC

16.416934674 0.000000000 0.000000000  
-0.357421897 13.093383045 0.000000000  
-0.317241471 -0.058933559 34.635155472

PRIMCOORD

1

343

1

|    |              |              |              |
|----|--------------|--------------|--------------|
| Si | 6.838721155  | 10.629329065 | 1.643193293  |
| Si | 15.047401215 | 10.567735691 | 1.650344375  |
| Si | 4.184326938  | 9.818117026  | 1.889021101  |
| Si | 12.409108953 | 9.809546454  | 1.842853622  |
| Si | 6.626995499  | 5.570251661  | 2.212339066  |
| Si | 14.819718605 | 5.549379101  | 2.235271696  |
| Si | 12.164232988 | 6.861666679  | 2.283538800  |
| Si | 3.975220307  | 6.879808215  | 2.283640817  |
| Si | 0.064368079  | 9.865073120  | 4.194374387  |
| Si | 8.293689066  | 9.905873787  | 4.160921904  |
| Si | 8.130316724  | 6.775878030  | 4.366314726  |
| Si | -0.107591455 | 6.746378913  | 4.394576022  |
| Si | 5.317853837  | 10.723306754 | 4.831663044  |
| Si | 13.519308127 | 10.722034071 | 4.812149454  |
| Si | 5.077981139  | 5.835295638  | 4.835003730  |
| Si | 13.269907570 | 5.850828579  | 4.859670110  |
| Si | 12.176008798 | 10.147879325 | 7.588745665  |
| Si | 3.991965020  | 10.145315873 | 7.620773936  |
| Si | 4.124869461  | 5.496597107  | 7.724694283  |
| Si | 12.302934249 | 5.529734784  | 7.723072643  |
| Si | 9.329910132  | 9.305675870  | 8.373670619  |
| Si | 1.154518096  | 9.304407169  | 8.374616044  |
| Si | 1.137898777  | 6.236633936  | 8.544519693  |
| Si | 9.313980825  | 6.239326286  | 8.555172010  |
| Si | 13.503963339 | 9.364848845  | 10.270628658 |
| Si | 5.321833677  | 9.358611035  | 10.289191942 |
| Si | 5.223603397  | 6.308476722  | 10.543866159 |
| Si | 13.431100611 | 6.318832910  | 10.543945362 |
| Si | 10.526578726 | 10.125739128 | 11.169448658 |
| Si | 2.350496800  | 10.132613116 | 11.172701068 |
| Si | 2.440395129  | 5.434429313  | 11.208180230 |
| Si | 10.634561998 | 5.447657461  | 11.218648805 |
| Si | 9.250097566  | 9.600615866  | 13.957572417 |
| Si | 1.069074013  | 9.602048202  | 13.960561419 |
| Si | 1.135996422  | 4.948355020  | 14.024157656 |
| Si | 9.340770935  | 4.937879517  | 14.039880053 |
| Si | 6.423269699  | 8.760346353  | 14.503666566 |
| Si | 14.655448521 | 8.774171415  | 14.493951432 |
| Si | 6.365349130  | 5.712671207  | 14.746232058 |
| Si | 14.585816952 | 5.746180968  | 14.713576988 |
| Si | 10.361336255 | 8.824641690  | 16.704636050 |
| Si | 2.192636590  | 8.818871615  | 16.704105862 |
| Si | 2.176669323  | 5.809860283  | 16.875476642 |

|    |              |              |              |
|----|--------------|--------------|--------------|
| Si | 10.360319707 | 5.807554578  | 16.905658798 |
| Si | 7.351862287  | 9.473018824  | 17.425482473 |
| Si | 15.607880775 | 9.493627503  | 17.411175894 |
| Si | 15.735722999 | 5.039884343  | 17.540623264 |
| Si | 7.533891314  | 4.969035055  | 17.579523771 |
| Al | 8.454206839  | 3.260526138  | 1.568419566  |
| Al | 0.265515278  | 3.275147955  | 1.491576157  |
| Al | 2.890413993  | 12.514837932 | 1.582201566  |
| Al | 11.066962452 | 12.506096382 | 1.580102593  |
| Al | 10.832732008 | 4.108827103  | 1.721492031  |
| Al | 2.654663130  | 4.117797696  | 1.673030562  |
| Al | 8.331061903  | 0.294451477  | 2.176483833  |
| Al | 0.139527322  | 0.293706243  | 2.141526627  |
| Al | 13.035341280 | 3.364526560  | 3.656406088  |
| Al | 4.827746601  | 3.347820047  | 3.622641105  |
| Al | 12.699509921 | 0.464328819  | 4.032358566  |
| Al | 4.501459420  | 0.451650629  | 4.040656283  |
| Al | 10.088524330 | 4.317928130  | 4.669349770  |
| Al | 1.881349248  | 4.281342428  | 4.624248582  |
| Al | 9.348982026  | 12.560509251 | 4.848359950  |
| Al | 1.132321615  | 12.549236042 | 4.823203610  |
| Al | 8.559952029  | 3.513180528  | 7.459621466  |
| Al | 0.346318261  | 3.521850140  | 7.402266980  |
| Al | -0.130612267 | 12.000567803 | 7.759751189  |
| Al | 8.052271466  | 12.008438430 | 7.784663124  |
| Al | 5.537039232  | 2.752982813  | 8.180646850  |
| Al | 13.758283995 | 2.794709208  | 8.168997460  |
| Al | 4.987520223  | 12.841920068 | 8.410643787  |
| Al | 13.210628420 | 12.860084921 | 8.391391562  |
| Al | 1.604937120  | 2.810092722  | 10.249552675 |
| Al | 9.788422312  | 2.809402286  | 10.308870182 |
| Al | 1.060884538  | 12.857614467 | 10.744769319 |
| Al | 9.239595585  | 12.859160364 | 10.785086506 |
| Al | 6.769392493  | 3.538813684  | 11.147304488 |
| Al | 15.010055918 | 3.554488150  | 11.135477303 |
| Al | 14.471430615 | 12.136128177 | 11.240009831 |
| Al | 6.260308681  | 12.125020689 | 11.264688743 |
| Al | 5.303768816  | 2.948620080  | 13.987173980 |
| Al | 13.545732900 | 2.949471542  | 13.981168201 |
| Al | 4.886807684  | 11.488413916 | 14.105001894 |
| Al | 13.092752478 | 11.500011696 | 14.087201970 |
| Al | 2.347296187  | 2.150289068  | 14.587988316 |
| Al | 10.579111762 | 2.141805071  | 14.585405735 |
| Al | 1.835369794  | 12.200364532 | 14.894886423 |
| Al | 10.050853848 | 12.202411408 | 14.877663142 |
| Al | 6.640319841  | 2.183895150  | 16.866967171 |
| Al | 14.853470716 | 2.213251032  | 16.864796206 |
| Al | 6.140200556  | 12.266079820 | 17.055942003 |
| Al | 14.356579189 | 12.277973769 | 17.047965750 |
| Al | 3.472328640  | 3.113869078  | 17.609130914 |
| Al | 11.693133322 | 3.135494618  | 17.612438939 |
| Al | 3.101695911  | 11.599637329 | 17.767044164 |
| Al | 11.325638024 | 11.600808981 | 17.765517027 |

|   |              |              |             |
|---|--------------|--------------|-------------|
| O | 9.770557167  | 3.560356930  | 0.502343186 |
| O | 1.580771067  | 3.631366157  | 0.435459637 |
| O | 13.875950423 | 9.679855049  | 1.015929884 |
| O | 5.651992909  | 9.729114323  | 1.073427174 |
| O | 11.385664026 | 10.833341789 | 1.213179704 |
| O | 3.191977476  | 10.841780736 | 1.219110436 |
| O | 7.155455342  | 4.442827844  | 1.292348800 |
| O | 15.342553855 | 4.434667026  | 1.298570833 |
| O | 1.663382354  | -0.140475975 | 1.448495361 |
| O | 9.839186516  | -0.141602491 | 1.448991845 |
| O | 6.880009164  | 12.136940010 | 1.358722823 |
| O | 15.127567923 | 12.073883813 | 1.368723443 |
| O | 15.902211191 | 1.811796280  | 1.815535731 |
| O | 7.655258329  | 1.822147310  | 1.957237185 |
| O | 5.444270792  | 6.543161145  | 1.652257579 |
| O | 13.619610222 | 6.481563772  | 1.653962221 |
| O | 3.477921606  | 8.369903603  | 1.877924504 |
| O | 11.709045892 | 8.362732994  | 1.872673081 |
| O | 10.984955876 | 5.873332936  | 2.008040351 |
| O | 2.815006375  | 5.871597705  | 2.005602278 |
| O | 12.303183266 | 3.341705244  | 2.154991896 |
| O | 4.126405945  | 3.338900435  | 2.099370543 |
| O | 12.741766251 | 0.063949918  | 2.376724178 |
| O | 4.568506206  | 0.067728050  | 2.380271819 |
| O | -0.363514973 | 9.747947458  | 2.599298311 |
| O | 7.883079321  | 9.822570309  | 2.558944765 |
| O | 7.818762313  | 6.550210949  | 2.809166617 |
| O | -0.424238975 | 6.555173458  | 2.829184566 |
| O | 9.578877951  | 3.785882212  | 3.096365433 |
| O | 1.401429057  | 3.778475830  | 3.032938559 |
| O | 12.976231812 | 10.108202262 | 3.397897098 |
| O | 4.711441734  | 10.101898875 | 3.454136838 |
| O | 14.193531655 | 4.865188765  | 3.740005427 |
| O | 5.966925093  | 4.866676990  | 3.688821561 |
| O | 8.293302074  | -0.156138793 | 3.899127914 |
| O | 0.101760006  | -0.086525909 | 3.883981144 |
| O | 12.483272366 | 7.047937597  | 3.967302235 |
| O | 4.293331798  | 7.051345103  | 3.970497865 |
| O | 1.331727564  | 10.754289500 | 4.551181611 |
| O | 9.575943061  | 10.764243508 | 4.557142976 |
| O | 8.699548482  | 8.350949852  | 4.634620821 |
| O | 0.463108979  | 8.316552954  | 4.699410069 |
| O | 13.547470575 | 1.947494394  | 4.486089541 |
| O | 5.300557490  | 1.954900170  | 4.531470519 |
| O | 11.154476243 | 0.421863472  | 4.830267348 |
| O | 2.955365680  | 0.363839914  | 4.822177869 |
| O | 5.160809330  | 12.288835243 | 4.919267053 |
| O | 13.339432992 | 12.284934359 | 4.915832532 |
| O | 3.837558904  | 4.563791143  | 4.753161363 |
| O | 12.035421515 | 4.573460660  | 4.765314950 |
| O | 6.863306942  | 10.107818211 | 4.991276560 |
| O | 15.064401705 | 10.111720036 | 5.041845750 |
| O | 1.194493719  | 5.963248285  | 4.978411939 |

|   |              |              |              |
|---|--------------|--------------|--------------|
| O | 9.434050735  | 6.020539238  | 4.979975281  |
| O | 6.703094256  | 6.686508888  | 5.210702835  |
| O | 14.888847512 | 6.682205797  | 5.261449747  |
| O | 9.559106759  | 3.335060604  | 5.993269476  |
| O | 1.322977565  | 3.277770885  | 5.925032132  |
| O | 12.801313929 | 9.796958400  | 6.065720643  |
| O | 4.636821532  | 9.805416689  | 6.109231628  |
| O | 12.812534826 | 6.448695918  | 6.412692877  |
| O | 4.649497079  | 6.393783323  | 6.407747392  |
| O | 8.790101284  | 12.937021148 | 6.482025078  |
| O | 0.599604362  | 12.931756542 | 6.458896291  |
| O | 6.377366810  | 12.342682680 | 7.498065179  |
| O | 14.611903148 | 12.350407697 | 7.499024566  |
| O | 7.006090980  | 2.760981003  | 7.206150061  |
| O | 10.771772891 | 9.235395774  | 7.510092777  |
| O | 2.594080868  | 9.227418310  | 7.511082437  |
| O | 15.187252329 | 2.825481770  | 7.142091249  |
| O | 0.018783392  | 10.125958909 | 7.591408484  |
| O | 8.199388858  | 10.139732646 | 7.595109694  |
| O | 12.516457665 | 3.982844518  | 7.576995837  |
| O | 4.286661917  | 3.940809743  | 7.582511412  |
| O | 2.602591385  | 6.165822485  | 7.795684427  |
| O | 10.774374791 | 6.165498575  | 7.805338440  |
| O | 4.706979964  | 1.242723137  | 7.783149193  |
| O | 12.940302347 | 1.278395925  | 7.780155031  |
| O | 0.077546309  | 5.208743402  | 8.003878258  |
| O | 8.252158977  | 5.208788035  | 8.014842588  |
| O | 11.926696959 | 11.628187058 | 8.011006852  |
| O | 3.695337399  | 11.609781359 | 8.076371714  |
| O | 0.520539751  | 7.754257777  | 8.158503882  |
| O | 8.694287120  | 7.756702292  | 8.160030942  |
| O | 1.386599130  | 2.676440744  | 8.520970372  |
| O | 9.617876889  | 2.679861702  | 8.577179939  |
| O | 13.239891677 | 9.294138028  | 8.592480840  |
| O | 5.064885955  | 9.288929635  | 8.611532500  |
| O | 4.998036622  | 6.168268779  | 8.949616208  |
| O | 13.175486635 | 6.174568874  | 8.956750742  |
| O | 0.748962090  | 12.274802833 | 9.165374601  |
| O | 8.916247433  | 12.280326621 | 9.202919235  |
| O | 9.644669831  | 9.439133172  | 9.952694940  |
| O | 1.468616872  | 9.439813837  | 9.954925608  |
| O | 5.737988110  | 2.962500792  | 9.885510107  |
| O | 13.977884635 | 2.967939741  | 9.879194276  |
| O | 5.248642601  | 12.929589889 | 10.103891473 |
| O | 13.425346407 | 12.927626762 | 10.096683147 |
| O | 1.406940059  | 6.320582681  | 10.195296357 |
| O | 9.583019222  | 6.321815491  | 10.211718469 |
| O | 11.109339348 | 4.053538475  | 10.678961138 |
| O | 2.929385210  | 4.046959482  | 10.665770699 |
| O | 5.901541369  | 7.842008638  | 10.737938724 |
| O | 14.125583189 | 7.852825566  | 10.684896328 |
| O | 14.584476081 | 10.401136120 | 10.744629295 |
| O | 6.407127190  | 10.395783984 | 10.750992195 |

|   |              |              |              |
|---|--------------|--------------|--------------|
| O | 0.302753942  | 3.700204492  | 10.983797657 |
| O | 8.480434555  | 3.692751619  | 11.038446973 |
| O | 2.266366701  | 1.299686838  | 10.827712764 |
| O | 10.444087797 | 1.299869119  | 10.895695236 |
| O | 12.044215732 | 9.435641847  | 11.039523343 |
| O | 3.860653179  | 9.440108376  | 11.042732205 |
| O | 6.320836790  | 5.393279026  | 11.261663020 |
| O | 14.555940566 | 5.426271648  | 11.257264146 |
| O | 10.457655032 | 11.666203346 | 11.394828539 |
| O | 2.277490717  | 11.675935348 | 11.394147161 |
| O | 3.797586634  | 6.443021582  | 11.384418271 |
| O | 11.999848226 | 6.448120262  | 11.389585533 |
| O | 16.015784781 | 12.792627795 | 11.695145398 |
| O | 7.788517254  | 12.788281991 | 11.754802720 |
| O | 9.991234418  | 9.211944833  | 12.495500298 |
| O | 1.814091948  | 9.215558737  | 12.499283288 |
| O | 6.245148400  | 2.602036195  | 12.544928324 |
| O | 14.488250938 | 2.612093168  | 12.534935779 |
| O | 1.768991157  | 5.798434428  | 12.692840079 |
| O | 9.951004458  | 5.800484411  | 12.701695260 |
| O | 5.308052668  | 12.476235365 | 12.712234076 |
| O | 13.549948932 | 12.486081316 | 12.706138916 |
| O | 3.751628321  | 2.305611128  | 13.573635611 |
| O | 11.992550017 | 2.301574488  | 13.576405710 |
| O | 16.110582731 | 8.631466033  | 13.710458731 |
| O | 7.877275318  | 8.634806329  | 13.713801176 |
| O | 5.304139376  | 9.653244705  | 13.783627964 |
| O | 13.541082793 | 9.673137029  | 13.779810592 |
| O | 1.162514746  | 3.388014916  | 14.005127044 |
| O | 7.802741249  | 5.578165233  | 13.924769770 |
| O | 16.031529620 | 5.638041329  | 13.910204362 |
| O | 9.407472534  | 3.381395219  | 14.004726857 |
| O | 3.188297121  | 11.316684711 | 14.277619474 |
| O | 11.387683858 | 11.319212424 | 14.215410239 |
| O | 5.793353052  | 7.214279849  | 14.219072044 |
| O | 13.978200127 | 7.242423758  | 14.215175989 |
| O | 5.217196721  | 4.699899407  | 14.360969798 |
| O | 9.713474643  | 0.633480351  | 14.362347367 |
| O | 1.518942823  | 0.628409835  | 14.355518629 |
| O | 13.460155303 | 4.701472357  | 14.359118156 |
| O | 0.525320003  | 10.996697947 | 14.433183809 |
| O | 8.745707281  | 11.006201075 | 14.431918555 |
| O | 10.219089630 | 8.716954664  | 15.008479841 |
| O | 2.037297067  | 8.714981076  | 15.008576794 |
| O | 6.155482505  | 2.084578297  | 15.225390644 |
| O | 14.397452343 | 2.086012961  | 15.218950482 |
| O | 1.960479833  | 5.646747549  | 15.257925071 |
| O | 10.131661674 | 5.644785433  | 15.290341328 |
| O | 6.012232455  | 12.052132934 | 15.306018930 |
| O | 14.196407003 | 12.055950205 | 15.307330736 |
| O | 14.780808795 | 8.913257716  | 16.092329658 |
| O | 6.535718874  | 8.910737314  | 16.097783554 |
| O | 2.633507806  | 2.374222903  | 16.317022630 |

|    |              |              |              |
|----|--------------|--------------|--------------|
| O  | 10.877864744 | 2.374326008  | 16.316371976 |
| O  | 6.693738750  | 5.867844712  | 16.340185830 |
| O  | 14.928125584 | 5.940099496  | 16.301001864 |
| O  | 10.239400862 | 12.332895566 | 16.599174351 |
| O  | 1.996305316  | 12.332458081 | 16.615775836 |
| O  | 2.865349065  | 7.321179661  | 17.033746830 |
| O  | 11.040021536 | 7.327456194  | 17.038796650 |
| O  | 16.021319442 | 3.531820174  | 17.100187770 |
| O  | 7.848218799  | 3.472637205  | 17.100542233 |
| O  | 3.211569327  | 9.853484102  | 17.317294310 |
| O  | 11.393198936 | 9.850069712  | 17.317397351 |
| O  | 8.860986878  | 8.845851842  | 17.315790815 |
| O  | 0.685384497  | 8.844832666  | 17.315678248 |
| O  | 7.390300600  | 0.702327627  | 17.387544975 |
| O  | 15.579297395 | 0.723112300  | 17.391357507 |
| O  | 3.360526178  | 4.918537708  | 17.530230397 |
| O  | 11.585413218 | 4.940297138  | 17.529012767 |
| O  | 0.775492245  | 5.794033505  | 17.690235056 |
| O  | 8.969690841  | 5.777752882  | 17.743109610 |
| O  | 7.282255656  | 11.018274477 | 17.680399664 |
| O  | 15.519344371 | 11.035705697 | 17.675511764 |
| O  | 5.247785819  | 2.880312780  | 17.889400105 |
| O  | 13.473624408 | 2.939359841  | 17.885312863 |
| O  | 4.682563022  | 12.198778048 | 17.961035236 |
| O  | 12.913256273 | 12.186890622 | 17.968114188 |
| O  | 6.533273143  | 8.555446218  | 18.599737365 |
| O  | 14.766419528 | 8.624391317  | 18.613458723 |
| O  | 6.469548746  | 5.137255652  | 18.762504161 |
| O  | 14.646652215 | 5.275909723  | 18.696463049 |
| O  | 2.670014304  | 2.436381290  | 19.043415396 |
| O  | 10.909154043 | 2.435696934  | 19.046235752 |
| O  | 10.298892377 | 12.056092733 | 19.187009873 |
| O  | 2.053460890  | 12.047490454 | 19.177442445 |
| Ca | 2.678823496  | 7.755956899  | 5.550384399  |
| Ca | 10.893199954 | 7.836997428  | 5.509880147  |
| Ca | 15.294876282 | 0.948606334  | 5.694906859  |
| Ca | 7.071811945  | 0.931826107  | 5.711581788  |
| Ca | 10.827371837 | 1.501702311  | 6.974691224  |
| Ca | 2.616822862  | 1.484841941  | 6.942805381  |
| Ca | 14.867431329 | 8.400655419  | 6.910570210  |
| Ca | 6.652530202  | 8.390709859  | 6.886753287  |
| Ca | 4.449334794  | 1.292370476  | 11.517252646 |
| Ca | 12.660714746 | 1.314117986  | 11.503367703 |
| Ca | -0.251726072 | 7.016201638  | 11.862278415 |
| Ca | 7.925379785  | 6.973414846  | 11.901815024 |
| Ca | 3.700621115  | 7.987903453  | 13.311632770 |
| Ca | 11.906318566 | 8.048942441  | 13.302622546 |
| Ca | 7.470936440  | 0.618514277  | 13.804579037 |
| Ca | 15.698486241 | 0.615801950  | 13.778219203 |
| Ca | 1.376936387  | 0.752500250  | 17.902470320 |
| Ca | 9.610847043  | 0.762823786  | 17.869040764 |
| Ca | 5.077181704  | 6.708592057  | 18.032330643 |
| Ca | 13.281967089 | 6.819288190  | 17.901582134 |

|   |              |              |              |
|---|--------------|--------------|--------------|
| H | 5.642187354  | 3.662665377  | 18.402890584 |
| H | 13.843765832 | 3.761414769  | 18.339426185 |
| H | 6.712223448  | 8.905638589  | 19.494640353 |
| H | 14.566102072 | 9.229407884  | 19.353095657 |
| H | 3.241269517  | 2.190694507  | 19.787783824 |
| H | 11.488077652 | 2.212669266  | 19.793335191 |
| H | 2.405775962  | 11.975163361 | 20.077037443 |
| H | 10.766136821 | 12.186979752 | 20.028048728 |
| C | 14.622990541 | 4.045405112  | 21.051582632 |
| C | 9.631431569  | 3.463877260  | 21.814551965 |
| C | 3.767758049  | 6.658136244  | 21.505295070 |
| C | 7.569618072  | 10.728157447 | 22.007503458 |
| C | 9.938137887  | 7.778775319  | 22.869982501 |
| C | 13.898086849 | 7.089573566  | 22.985501510 |
| C | 15.884362061 | 1.011257854  | 23.092508828 |
| C | 3.278773455  | 11.022719180 | 23.166411464 |
| C | 12.030219931 | 0.467908254  | 23.305088012 |
| O | 15.752647434 | 3.752228585  | 20.931634652 |
| O | 7.626048839  | 10.132647393 | 20.993963418 |
| O | 8.878476064  | 4.187871630  | 21.282807496 |
| O | 13.486687824 | 4.315180897  | 21.209263243 |
| O | 4.223517386  | 6.592669960  | 20.419594375 |
| O | 10.478739076 | 6.866580132  | 22.365855246 |
| O | 2.486000484  | 11.019954987 | 22.295689279 |
| O | 3.328674578  | 6.726302600  | 22.583940654 |
| O | 14.993664658 | 1.408512089  | 22.438087690 |
| O | 10.373760241 | 2.734661471  | 22.363830334 |
| O | 13.290839264 | 8.040473084  | 22.651990911 |
| O | 11.473466823 | 0.025910250  | 22.367428107 |
| O | 7.506172281  | 11.316379781 | 23.017673527 |
| O | 14.508939014 | 6.144680327  | 23.314642140 |
| O | 9.396840528  | 8.689960336  | 23.377245223 |
| O | 16.775424456 | 0.610991242  | 23.742341079 |
| O | 4.075312864  | 11.015415967 | 24.027246423 |
| O | 12.587408203 | 0.901606434  | 24.242121051 |
